# Supplementary material for: Aquatic community structure of the important habitat of Acipenser sinensis in the Yangtze River Estuary
Source: Research Square preprint supplement (doi:10.21203/rs.3.rs-7430125/v1), 2025-09-11

### 机构审查委员会声明

本实验属于正常的鱼类资源调查实验,是在符合实验动物伦理和福利的前提下进行的。本实验遵守所有适用的机构和政府有关使用实验动物的道德规定。

特此证明。

中国水产科学研究院东海水产研究所科研处

2025年7月16日

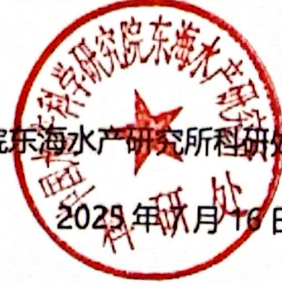

### Institutional Review Board Statement

This experiment is a normal fish resource survey experiment conducted under the premise of complying with the ethics and welfare of experimental animals. This experiment complies with all applicable ethical regulations of institutions and governments regarding the use of experimental animals.

Hereby certify.

Division of Scientific Research Management,  
East China Sea Fisheries Research Institute,  
Chinese Academy of Fishery Sciences.  
Date of Certifications July 16th, 2025

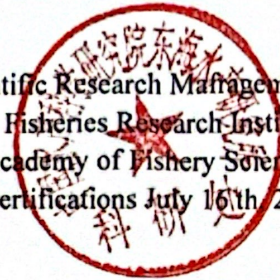

Supplement: Supplementary file 1 [file eeb77d246fee50a2924369e6.pdf]
